# Supplementary material for: IBF-R Regulates IRE1α Post-Translational Modifications and ER Stress in High-Fat Diet-Induced Obese Mice
Source: MDPI journal article supplement (doi:10.3390/nu14010217), 2022-01-04
Supplement: s1 [file s1]

## Supplementary Figure Legends

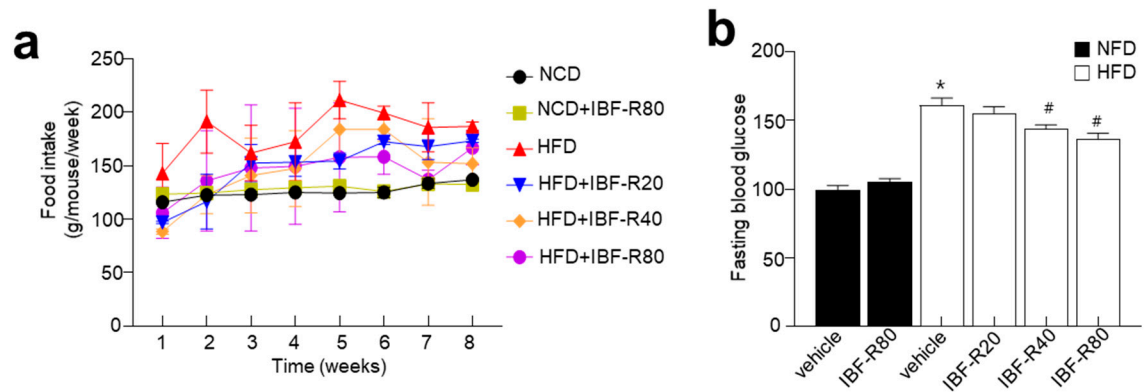

**Figure S1. Influence of IBF-R on food intake and blood glucose levels.** (a) Quantification food intake during the experimental period. (b) Glucose levels from each group (\*  $p < 0.05$  vs. NCD + vehicle, #  $p < 0.05$  vs. HFD + vehicle).

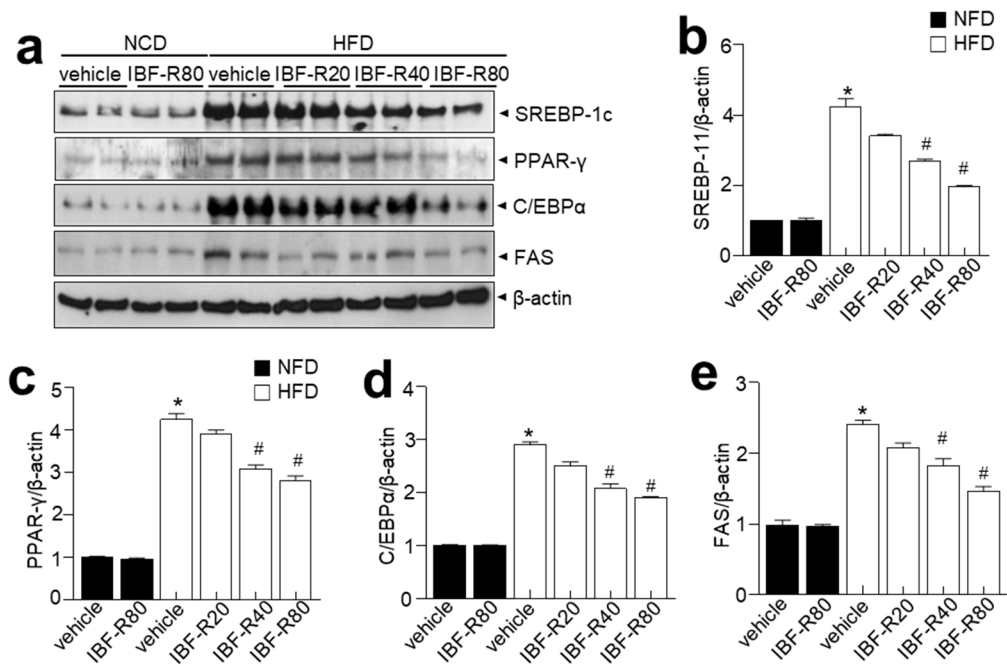

**Figure S2. IBF-R determines adipogenic factors in liver tissue.** (a) Immunoblotting of SREBP-1c, PPAR-γ, C/EBPα, FAS, and β-actin expressions in liver. (b-e) Quantitative analysis of protein expression was also performed. Data are presented as mean ± SEM ( $n = 10$ , \*  $p < 0.05$  vs. NCD + vehicle, #  $p < 0.05$  vs. HFD + vehicle). eWAT; epididymal WAT
